# Supplementary material
Source: PubMed Central journal article supplement (PMC3761644)
Supplement: 1302797110_pnas.201302797SI.pdf [file 1302797110_pnas.201302797SI.pdf]

# Supporting Information

Papaioannou et al. 10.1073/pnas.1302797110

## SI Materials and Methods

**Zebrafish Experiments.** Zebrafish experiments were performed as previously described (1) on approval by the Animal Care and Use Committee of Shinshu University School of Medicine. One nanogram of synthesized GFP or Lin28a RNA was coinjected with 50  $\mu$ M scrambled or microRNA-140 morpholino oligo (2) in one- or two-cell stage embryos. Fish were harvested at 6 d post-fertilization and subjected to whole-mount Alcian blue staining.

**In Situ Hybridization.** In situ hybridization for *Col10a1* and *Spp1* was performed as previously described (3).

**Cell Cycle Analysis.** Pregnant mice with embryo day (E) 11.5 embryos were injected with BrdU 1 h before euthanasia. Embryos

were harvested and genotyped, and limb buds were collected. Limb buds from both forelimbs and hind limbs were dispersed to single cells by trypsinization. Cells were subjected to cell cycle analysis using the APC BrdU Flow Kit (BD Pharmingen) according to the manufacturer's instructions.

**LIN28A Immunohistochemistry.** Frozen sections of E12.5 limb buds were cut, lightly fixed with 10% (vol/vol) formalin, and subjected to immunohistochemistry using the anti-LIN28A antibody (Cell Signaling) at a dilution of 1:50 and the ImmunoCruz Rabbit LSAB Staining System (Santa Cruz Biotechnology).

**Whole-Mount X-Gal Staining.** Whole-mount X-gal staining was performed as described previously (4).

1. Nakamura Y, et al. (2007) The CCN family member Wisp3, mutant in progressive pseudorheumatoid dysplasia, modulates BMP and Wnt signaling. *J Clin Invest* 117(10): 3075–3086.
2. Eberhart JK, et al. (2008) MicroRNA Mirn140 modulates Pdgf signaling during palatogenesis. *Nat Genet* 40(3):290–298.

3. Kobayashi T, et al. (2008) Dicer-dependent pathways regulate chondrocyte proliferation and differentiation. *Proc Natl Acad Sci USA* 105(6):1949–1954.
4. Chung UI, Lanske B, Lee K, Li E, Kronenberg H (1998) The parathyroid hormone/parathyroid hormone-related peptide receptor coordinates endochondral bone development by directly controlling chondrocyte differentiation. *Proc Natl Acad Sci USA* 95(22):13030–13035.

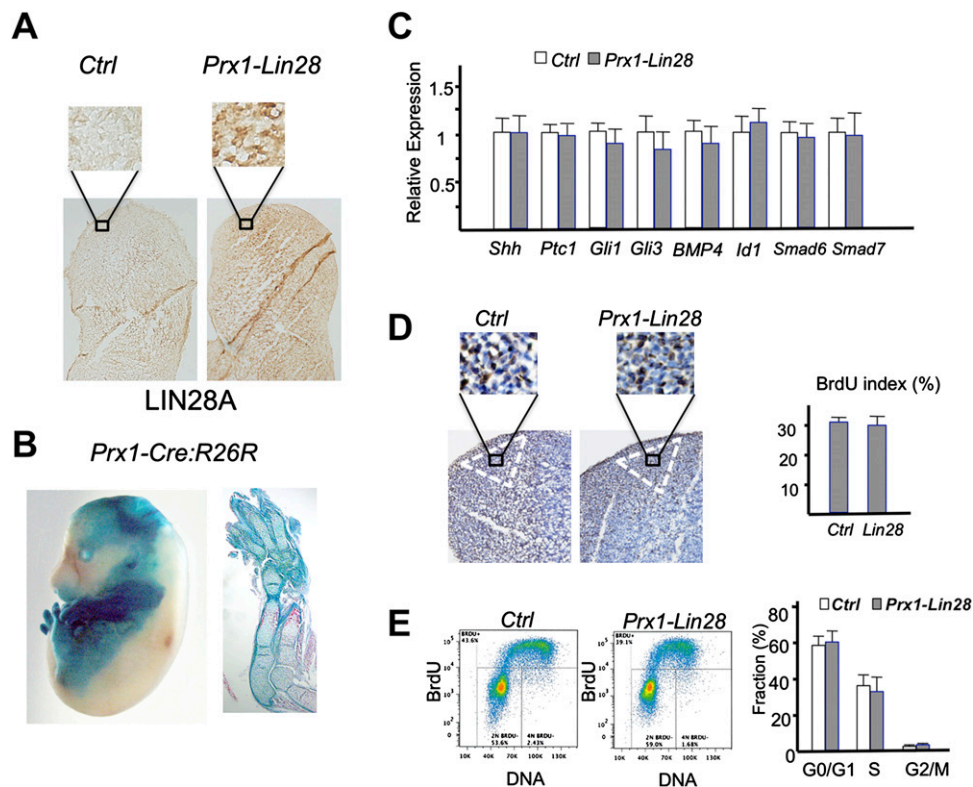

**Fig. S1.** Analysis of *Prx1-Cre:Lin28a<sup>c</sup>* (*Prx1-Lin28*) limb buds. (A) LIN28A expression in *Prx1-Lin28* limb buds. Frozen sections of E12.5 forelimb buds were subjected to immunohistochemical analysis to detect LIN28A. In *Prx1-Lin28* limb buds, LIN28A signals are diffusely detected, although with variable intensities, whereas endogenous LIN28A is expressed at a low level in WT littermates (*Ctrl*). (Original magnification,  $\times 40$ .) (Insets) Magnified views are shown. (Magnification,  $\times 200$ .) (B, Left) Whole-mount X-gal staining of E14.5 mice carrying both the *Prx1-Cre* transgene and the *Rosa 26-R* (*R26R*) LacZ Cre reporter allele shows that *Prx1-Cre*-expressing cells give rise to cells in the skull and limbs. (Right) Sections of the forelimb show that chondrocytes are descendants of *Prx1-Cre*-expressing cells. (C) Quantitative RT-PCR analysis for Shh and BMP signaling. Expression of indicated genes was quantified in E11.5 limb bud cells. (D and E) BrdU labeling assay. (D) Frozen sections of BrdU-injected E12.5 forelimb buds were stained for BrdU. Interdigital ray regions (indicated by white dotted lines) were selected and counted. (Original magnification,  $\times 100$ .) (Insets) Magnified views are shown. (Magnification,  $\times 200$ .) The BrdU index in *Prx1-Cre:Lin28a<sup>c</sup>* (*Lin28*) mice is not significantly increased compared with controls (*Ctrl*; *Prx1-Cre* or *Lin28a<sup>c</sup>* single-transgenic or WT littermates;  $n = 3$  in each group). (E) Flow cytometric analysis of E11.5 limb bud cells was performed to assess the cell cycle status. Representative flow pictures are shown. The cell cycle status of *Lin28* mice ( $n = 3$ ) was similar to that of *Ctrl* ( $n = 4$ ).

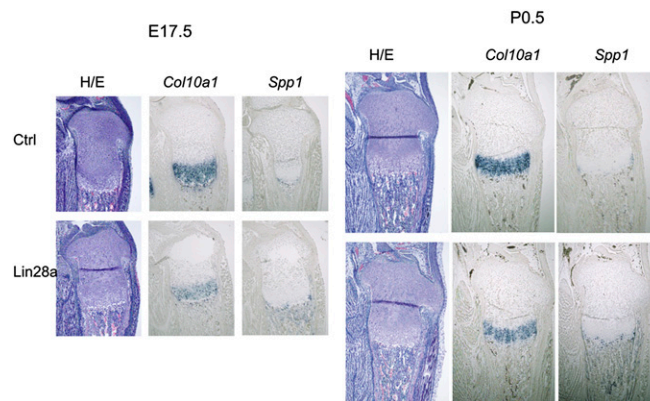

**Fig. S2.** Normal expression of type X collagen (*Col10a1*) and osteopontin (*Spp1*) mRNA expression in the tibial growth plate of *Col2-Cre:Lin28a<sup>c</sup>* mice. In situ hybridization was performed on sections on E17.5 and postnatal day (P) 0.5 mice. (Original magnification,  $\times 40$ .)

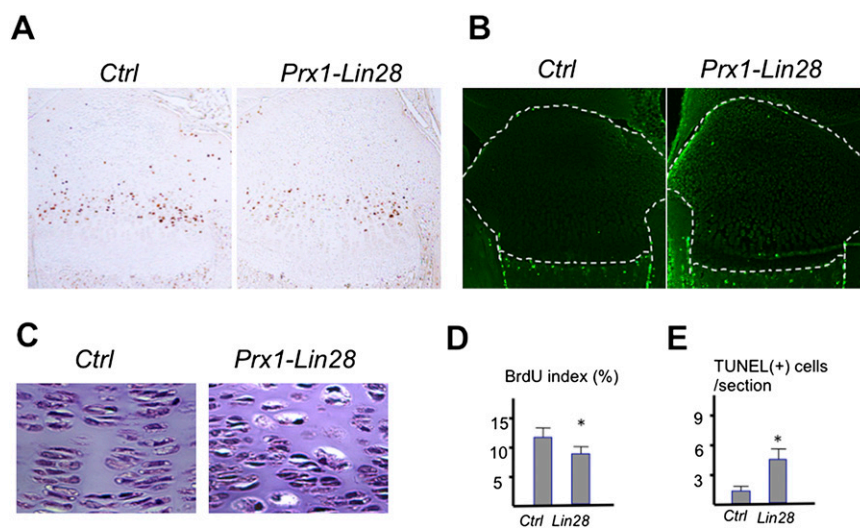

**Fig. S3.** Growth plate phenotypes of *Prx1-Cre:Lin28a<sup>c</sup>* mice. (A) BrdU labeling assay on P9 tibial growth plates shows a reduction in cell proliferation in *Prx1-Cre:Lin28a<sup>c</sup>* (*Prx1-Lin28*) chondrocytes compared with *Ctrl*. (Original magnification,  $\times 40$ .) (B) TUNEL-positive cells are increased in *Prx1-Lin28* mice. (Magnification,  $\times 40$ .) (C) Morphological changes similar to those in *Col2-Cre:Lin28a<sup>c</sup>* mice are also present in the *Prx1-Lin28* growth plate. (Magnification,  $\times 200$ .) (D and E) Quantification of A and B ( $n = 3$ ; \* $P < 0.05$  vs. *Ctrl*).



**Table S1. Up-regulated genes in *Lin28a*-overexpressing chondrocytes**

| Probe set | Gene                                                                             | Accession no.     | Lin28<br>Ctrl1 | Lin28<br>Tg1 | Lin28<br>Ctrl2 | Lin28<br>Tg2 | Tg/Ctrl     | TargetScan   |
|-----------|----------------------------------------------------------------------------------|-------------------|----------------|--------------|----------------|--------------|-------------|--------------|
| 10517159  | Lin28: Lin-28 homolog ( <i>Caenorhabditis elegans</i> )                          | NM_145833         | 600.26         | 8,663.37     | 418.02         | 10,872.87    | 19.18552854 | let-7 target |
| 10360145  | B930036N10Rik: (Refbp2?)RIKEN cDNA B930036N10 gene                               | AK047216          | 360.64         | 775.48       | 452.78         | 1,053.99     | 2.249108702 |              |
| 10515755  | Mpl: Myeloproliferative leukemia virus oncogene                                  | NM_001122949      | 597.29         | 1,055.97     | 745.31         | 1,955.61     | 2.243095486 |              |
| 10400510  | Clec14a: C-type lectin domain family 14, member a                                | NM_025809         | 406.45         | 634.52       | 348.52         | 1,013.24     | 2.1825503   |              |
| 10372796  | <b>Hmga2: High-mobility group AT-hook 2</b>                                      | NM_010441         | 5,677.33       | 13,099.42    | 5,595.73       | 10,355.23    | 2.080593024 | let7 target  |
| 10351224  | F5: Coagulation factor V                                                         | NM_007976         | 700.94         | 1,244.65     | 653.44         | 1,534.83     | 2.052215774 |              |
| 10483150  | Fign: Fidgetin                                                                   | NM_021716         | 594.14         | 1,064.44     | 707.98         | 1,598.71     | 2.045241606 | let7 target  |
| 10455967  | 2610318N02Rik: RIKEN cDNA 2610318N02 gene                                        | ENSMUST0000093336 | 753.29         | 1,466.25     | 1,207.62       | 2,455.85     | 2.000142791 |              |
| 10537026  | Cpa4: Carboxypeptidase A4                                                        | NM_027926         | 429.68         | 823.51       | 294.43         | 605.26       | 1.97313944  | let7 target  |
| 10569399  | Trpm5: Transient receptor potential cation channel, subfamily M, member 5        | NM_020277         | 645.2          | 1,154.25     | 837.78         | 1,735.35     | 1.948509083 |              |
| 10444236  | H2-DMb2: Histocompatibility 2, class II, locus Mb2                               | NM_010388         | 743.71         | 1,316.8      | 699.16         | 1,449.64     | 1.917317568 |              |
| 10530772  | Nmu: Neuromedin U                                                                | NM_019515         | 435.34         | 733.93       | 448.72         | 896.94       | 1.844750356 |              |
| 10444229  | H2-DMA: Histocompatibility 2, class II, locus DMA                                | NM_010386         | 2,716.6        | 4,806.13     | 3,168.74       | 6,025.54     | 1.84044932  |              |
| 10523701  | Ibsp: Integrin binding sialoprotein                                              | NM_008318         | 2,244.29       | 3,666.17     | 1,561.14       | 3,275.24     | 1.824080327 |              |
| 10390211  | Igf2bp1: Insulin-like growth factor 2 mRNA binding protein 1                     | NM_009951         | 1,434.45       | 2,345.93     | 1,992.75       | 3,738.67     | 1.775385154 | let7 target  |
| 10387821  | Alox12: Arachidonate 12-lipoxygenase                                             | NM_007440         | 3,306.09       | 5,359.84     | 960.93         | 1,983.51     | 1.72095514  |              |
| 10569429  | Cdkn1c: Cyclin-dependent kinase inhibitor 1C (P57)                               | NM_009876         | 4,727.38       | 7,776.59     | 5,655.81       | 10,021.44    | 1.714119649 |              |
| 10582658  | Agt: Angiotensinogen (serpin peptidase inhibitor, clade A, member 8)             | NM_007428         | 1,860.8        | 2,916.9      | 1,857.63       | 3,451.06     | 1.71253997  |              |
| 10485948  | Grem1: Gremlin 1                                                                 | NM_011824         | 5,854.1        | 10,113.31    | 3,120.97       | 5,181.05     | 1.704093673 |              |
| 10583044  | Mmp13: Matrix metalloproteinase 13                                               | NM_008607         | 2,261.39       | 3,626.99     | 2,432.45       | 4,363.51     | 1.702337532 |              |
| 10552494  | Klk9: Kallikrein related-peptidase 9                                             | NM_028660         | 738.92         | 1,387.28     | 337.76         | 442.72       | 1.699669354 |              |
| 10567355  | Gprc5b: G protein-coupled receptor, family C, group 5, member B                  | NM_022420         | 758.67         | 1,131.56     | 907.87         | 1,639.55     | 1.662792372 |              |
| 10478048  | Lbp: LPS binding protein                                                         | NM_008489         | 3,014.08       | 4,714.69     | 1,820.57       | 3,319.92     | 1.661880384 |              |
| 10436590  | 2810055G20Rik: RIKEN cDNA 2810055G20 gene                                        | AK148800          | 688.23         | 1,031.61     | 584.31         | 1,076.87     | 1.656906659 |              |
| 10356240  | Slc16a14: Solute carrier family 16 (monocarboxylic acid transporters), member 14 | NM_027921         | 1,245.99       | 1,873.27     | 1,432.07       | 2,546.61     | 1.65040365  |              |
| 10359689  | Atp1b1: ATPase, Na <sup>+</sup> /K <sup>+</sup> transporting, beta-1 polypeptide | NM_009721         | 2,926.58       | 5,280.96     | 2,865.56       | 4,269.75     | 1.648908694 |              |
| 10511333  | Plag1: Pleiomorphic adenoma gene 1                                               | NM_019969         | 817.47         | 1,391.17     | 1,546.15       | 2,396.03     | 1.602288016 |              |
| 10488626  | Zcchc3: Zinc finger, CCHC domain containing 3                                    | NM_175126         | 2,604.47       | 3,999.39     | 2,072.64       | 3,371.06     | 1.575855603 | let7 target  |
| 10471814  | Gpr21: G protein-coupled receptor 21                                             | NM_177383         | 467.25         | 770.29       | 573.65         | 864.54       | 1.570592756 |              |
| 10564726  | Rlbp1: Retinaldehyde binding protein 1                                           | NM_020599         | 1,182.4        | 1,747.6      | 897.64         | 1,518.41     | 1.57016692  |              |
| 10571840  | Hpgd: Hydroxyprostaglandin dehydrogenase 15 (NAD)                                | NM_008278         | 5,256.55       | 7,676.49     | 4,059.4        | 6,939.88     | 1.568961834 |              |
| 10516735  | Tinagl1: Tubulointerstitial nephritis antigen-like 1                             | NM_023476         | 29,24.23       | 5,454.64     | 2,937.33       | 3,715.01     | 1.564370236 |              |
| 10585186  | 1600029D21Rik: RIKEN cDNA 1600029D21 gene (placenta-expressed transcript 1)      | NM_029639         | 3,985.17       | 6,332.57     | 1,318.63       | 1,939.92     | 1.559728874 |              |
| 10360053  | Pcp4l1: Purkinje cell protein 4-like 1                                           | NM_025557         | 1,055.93       | 1,940.56     | 1,072.02       | 1,372.32     | 1.556841091 |              |
| 10488697  | <b>Plagl2: Pleiomorphic adenoma gene-like 2</b>                                  | NM_018807         | 2,995.36       | 4,385.7      | 2,932.34       | 4,841.16     | 1.556566628 | let7 target  |
| 10490894  | <b>E2f5: E2F transcription factor 5</b>                                          | NM_007892         | 3,379.48       | 5,010.32     | 2,929.66       | 4,755.58     | 1.547897178 | let7 target  |
| 10505911  | Dmrta1: Doublesex and mAb-3-related transcription factor-like family A1          | NM_175647         | 1,262.36       | 2,127.76     | 1,375.2        | 1,953.48     | 1.547354373 |              |
| 10597258  | Tmie: Transmembrane inner ear                                                    | NM_146260         | 502.95         | 794.82       | 569.14         | 863.03       | 1.54637204  |              |
| 10489985  | Atp9a: ATPase, class II, type 9A                                                 | NM_015731         | 790.86         | 1,152.25     | 704.76         | 1,159.23     | 1.545499525 |              |
| 10586118  | Calml4: Calmodulin-like 4                                                        | NM_138304         | 737.19         | 1,212.5      | 1,016.97       | 1,468.66     | 1.528458065 |              |

Table S1. Cont.

| Probe set | Gene                                                                           | Accession no.      | Lin28<br>Ctrl1 | Lin28<br>Tg1 | Lin28<br>Ctrl2 | Lin28<br>Tg2 | Tg/Ctrl     | TargetScan  |
|-----------|--------------------------------------------------------------------------------|--------------------|----------------|--------------|----------------|--------------|-------------|-------------|
| 10438603  | Igf2bp2: Insulin-like growth factor 2 mRNA binding protein 2                   | NM_183029          | 6,001.02       | 9,205.94     | 7,163.64       | 10,905.27    | 1.527666495 | let7 target |
| 10526487  | Alkbh4: alkB, Alkylation repair homolog 4 ( <i>Escherichia coli</i> )          | NM_028070          | 3,222.58       | 4,573.01     | 2,937.59       | 4,823.22     | 1.525319918 |             |
| 10454235  | Asxl3: Additional sex combs like 3 ( <i>Drosophila</i> )                       | ENSMUST00000062608 | 676.77         | 1,046.54     | 766.31         | 1,152.32     | 1.523727028 |             |
| 10583669  | AB124611: cDNA sequence AB124611                                               | AB124611           | 1,308.19       | 1,938.68     | 1,101.87       | 1,678.63     | 1.500921139 |             |
| 10438091  | 2610318N02Rik: RIKEN cDNA 2610318N02 gene                                      | BC039993           | 240.91         | 349.68       | 424.07         | 640.72       | 1.489368101 |             |
| 10403834  | Sfrp4: Secreted frizzled-related protein 4                                     | NM_016687          | 573.37         | 886.7        | 356.79         | 491.43       | 1.481605315 |             |
| 10380415  | <b>Cdc34: Cell division cycle 34 homolog (<i>Saccharomyces cerevisiae</i>)</b> | BC094502           | 2,977.95       | 4,903.79     | 2,914.46       | 3,780.67     | 1.473838379 | let7 target |
| 10492355  | Mme: Membrane metalloendopeptidase                                             | NM_008604          | 757.47         | 1,157.36     | 1,030.71       | 1,477.95     | 1.473738662 |             |
| 10408928  | Hspb1: Heat shock protein 1                                                    | NM_013560          | 7,089.37       | 10,757.31    | 4,143.68       | 5,630.32     | 1.458876262 |             |
| 10526410  | Hspb1: Heat shock protein 1                                                    | NM_013560          | 6,830.69       | 10,322.43    | 3,979.15       | 5,439.28     | 1.458089111 |             |
| 10353102  | Cpa6: Carboxypeptidase A6                                                      | NM_177834          | 474.82         | 669.54       | 341.33         | 520.18       | 1.457722232 |             |
| 10523190  | 9130213B05Rik: RIKEN cDNA 9130213B05 gene                                      | BC006604           | 2,652.16       | 3,860.99     | 3,107.85       | 4,508.52     | 1.453037408 |             |
| 10552037  | Sbsn: Suprabasin                                                               | NM_172205          | 1,404.61       | 2,103.41     | 1,251.56       | 1,742.27     | 1.447829017 |             |
| 10415413  | BC030046: cDNA sequence BC030046                                               | BC057379           | 3,360.22       | 4,738.76     | 3,081.82       | 4,467.97     | 1.429163743 |             |
| 10364455  | <b>Cdc34: Cell division cycle 34 homolog (<i>S. cerevisiae</i>)</b>            | NM_177613          | 7,230.34       | 10,766.08    | 6,680.04       | 9,110.3      | 1.428888355 | let7 target |
| 10488954  | Gdf5: Growth differentiation factor 5                                          | NM_008109          | 541.54         | 759.06       | 539.94         | 772.11       | 1.415809816 |             |
| 10438778  | Tmem207: Transmembrane protein 207                                             | AK142524           | 280.35         | 400.52       | 245.76         | 336.13       | 1.400182471 |             |
| 10595840  | Acpl2: Acid phosphatase-like 2                                                 | NM_153420          | 2,226.9        | 3,170.25     | 1,120.72       | 1,404.5      | 1.36656789  |             |
| 10544523  | Rny1: RNA, Y1 small cytoplasmic, Ro-associated                                 | NR_004419          | 750.45         | 1,106.44     | 2,663.13       | 3,267.37     | 1.281297055 |             |

Alterations in the gene expression profile of primary rib chondrocytes after *Lin28a* overexpression was investigated. Among those whose signal intensity was greater than 200 (30,725 probes of a total 35,512 probes, with an average intensity of 2,838), we found that expression of 56 genes was up-regulated by more than 40% by *Lin28a* overexpression. Among these 56 genes, 10 (17.8%) were predicted to be let-7 target genes.
